# Supplementary material for: LIVE-PAINT allows super-resolution microscopy inside living cells using reversible peptide-protein interactions
Source: PubMed Central journal article supplement (PMC7441314; doi:10.1038/s42003-020-01188-6), 2020-08-20
Supplement: 42003_2020_1188_MOESM1_ESM.pdf [file 42003_2020_1188_MOESM1_ESM.pdf]

1 **Supplementary Figures**

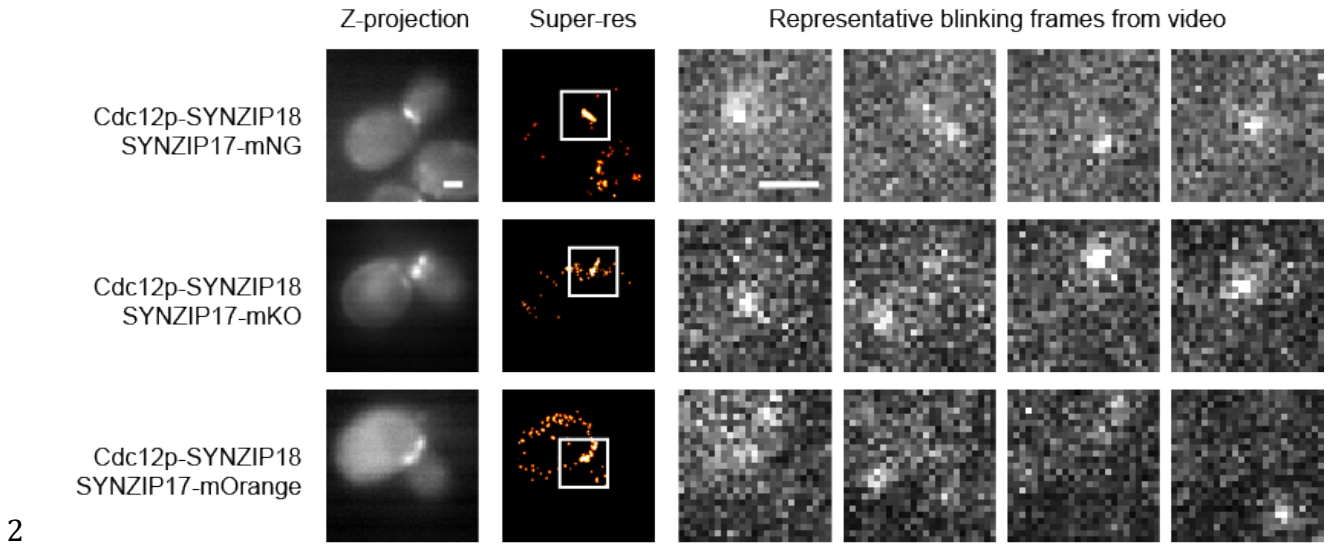

2

3 Supplementary Figure 1. LIVE-PAINT can be performed with different fluorescent  
4 proteins. LIVE-PAINT was performed using the SYNZIP17-18 interaction pair to tag  
5 Cdc12p and three different fluorescent proteins: mNG, mKO, and mOrange, as  
6 indicated. (Left) Z-projections showing the average fluorescence signal for each video,  
7 calculated by integrating the average intensity over the entire video. (Middle) Super-  
8 resolution images for each video. The white box corresponds to the cropped region  
9 shown in the “representative blinking frames from video” section at right. (Right)  
10 Representative frames from the video, showing bright “blinks” in different locations. All  
11 images were constructed from videos collected for 1,000 frames, with a 50 ms exposure  
12 per frame. Number of localization events: mNG: 531; mKO: 280; mOrange: 154. Scale  
13 bars are 1  $\mu\text{m}$ . The mNG images were obtained with a 488 nm laser, using a power of 3  
14  $\text{W}/\text{cm}^2$ , while the mKO and mOrange images were obtained with a 561 nm laser, using  
15 a power density of 50  $\text{W}/\text{cm}^2$  (see methods).

16

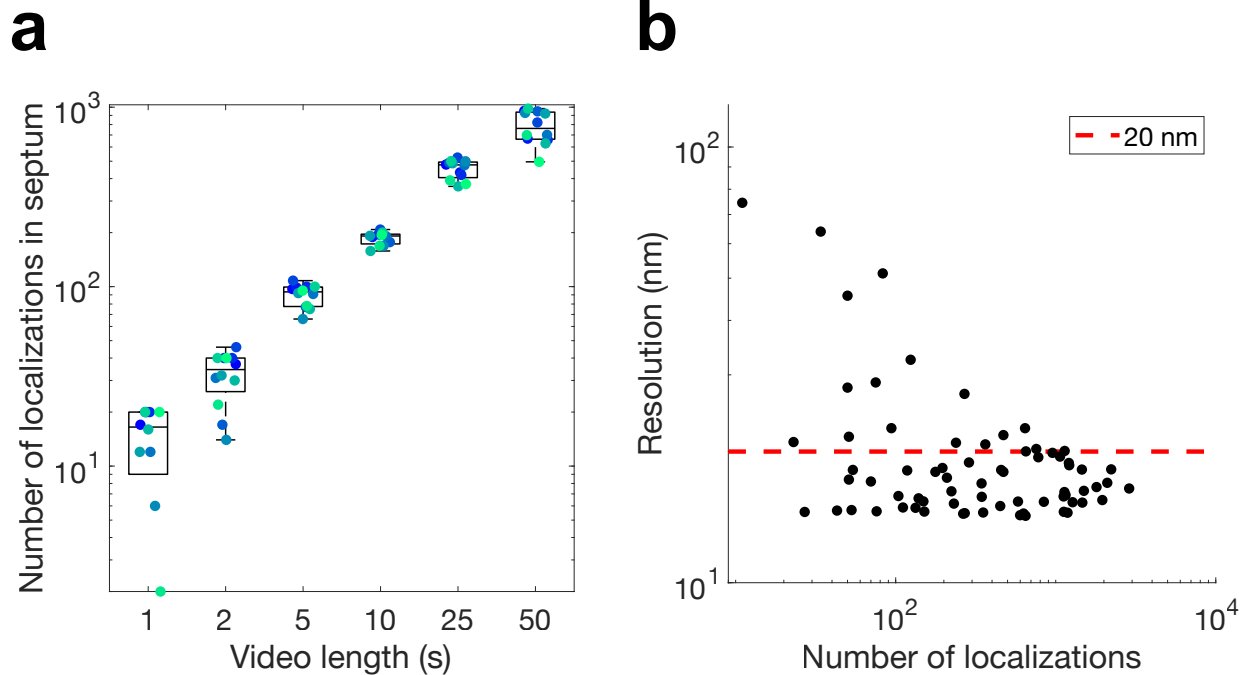

18  
 19 Supplementary Figure 2. Image resolution can reach 20 nm within five seconds while  
 20 imaging Cdc12p-SYNZIP18 + SYNZIP17-mNG. 12 individual cells were imaged for 50 s  
 21 (1,000 frames with 50 ms exposures). (a) Videos were truncated after the given number  
 22 of seconds as shown. For each video the number of localizations in the septum is  
 23 shown. Each cell is indicated by a different color dot, which can be tracked across the  
 24 different video lengths. In the box, the middle line represents the median, the bottom  
 25 line represents the 25th percentile, and the bottom line represents the 75th percentile.  
 26 The whiskers reach to the furthest points in the data which are not outliers. (b)  
 27 Resolution was calculated for each of the points in (A) and shown as a function of the  
 28 number of localizations in the septum (as described in Methods). Cells were grown in  
 29 media containing 0.005% galactose.

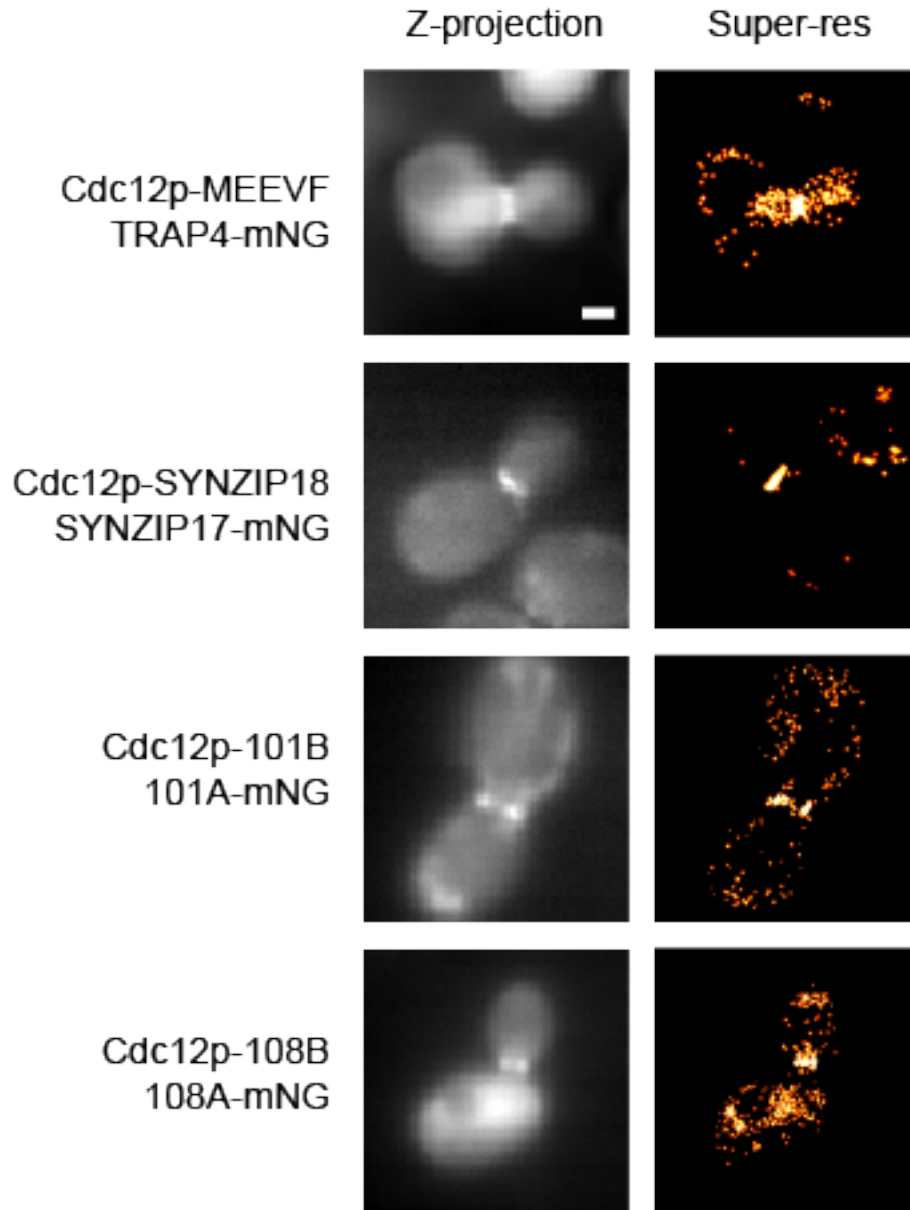

31

32 Supplementary Figure 3. LIVE-PAINT can be performed with different peptide-protein  
 33 interaction pairs. The interaction pairs, TRAP4-MEEVF, SYNZIP17-SYNZIP18, 101A-  
 34 101B, and 108A-108B, were used to tag Cdc12p and imaged, as indicated. (Left) Z-  
 35 projections showing the average fluorescence signal for each video, calculated by  
 36 integrating the average intensity over the entire video. (Right) Super-resolution images  
 37 for each video. All images were constructed from videos collected for 1,000 frames, with

38 a 50 ms exposure per frame. Number of localization events: TRAP4-MEEVF: 429;  
39 SYNZIP17-SYNZIP18: 398; 101A-101B: 582; 108A-108B: 803. Images were recorded  
40 with an exposure time of 50 ms with a laser power density of  $3.1 \text{ W/cm}^2$ . Scale bars are  
41  $1 \mu\text{m}$ .  
42

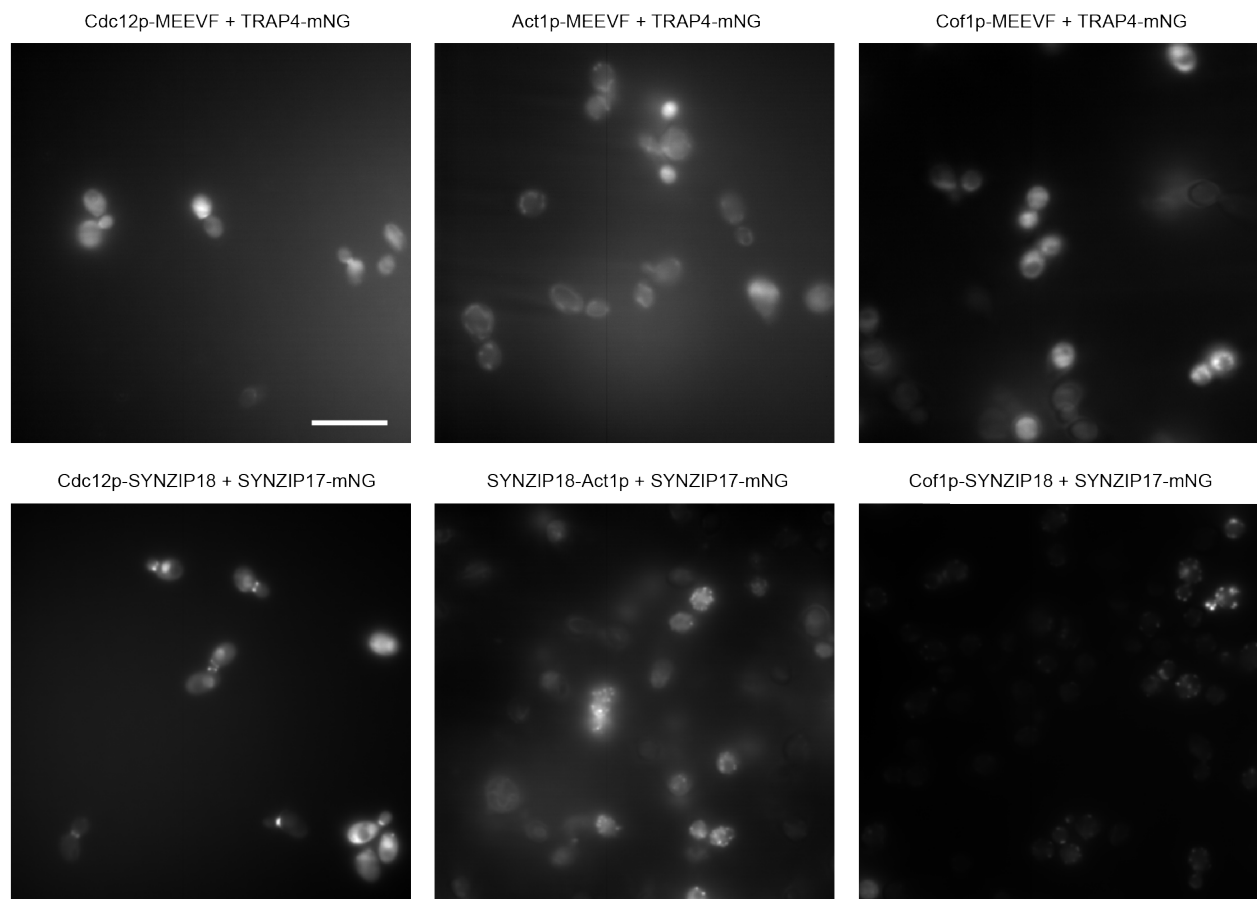

43  
 44 Supplementary Figure 4. TRAP4-MEEVF and SYNZIP17-SYNZIP18 interactions are  
 45 specific inside the cell. Maximum projection images of Cdc12p, Act1p, and Cof1p, which  
 46 were tagged by either the TRAP4-MEEVF (top row) or SYNZIP17-SYNZIP18 (bottom  
 47 row) interaction pair. Structures localized to the septum are seen when tagging Cdc12  
 48 and puncta around the edge of the cell are observed when tagging actin of Cof1. All  
 49 images were constructed from videos collected for 1,000 frames, with a 50 ms exposure  
 50 per frame and a laser power density of 3.1 W/cm<sup>2</sup>. Scale bar is 10 μm.

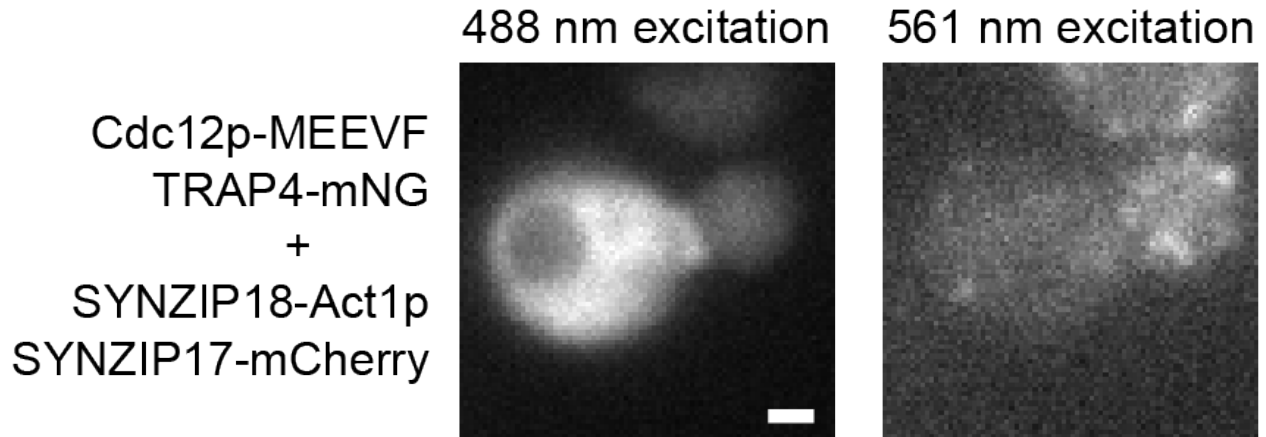

51

52 Supplementary Figure 5. TRAP4-MEEVF and SYNZIP17-SYNZIP18 interaction pairs  
53 are orthogonal to one another and can be used with two different fluorescent proteins  
54 for concurrent imaging. Fluorescence images of a cell expressing both Cdc12p-  
55 MEEVF+TRAP4-mNG and SYNZIP18-Act1p+SYNZIP17-mCherry. (Left) Cell imaged  
56 using a 488 nm excitation laser and green emission filter. Structure at yeast septum,  
57 corresponding to the location of Cdc12p, is clearly visible. mNG fluorescence would be  
58 detected using these excitation and emission settings. (Right) Cell imaged using a 561  
59 nm excitation laser, using a power density of 50 W/cm<sup>2</sup>. Distinctive structures around  
60 the edge of the cell, corresponding to the location of Act1p, are clearly visible. mCherry  
61 fluorescence would be detected using these excitation and emission settings. Images  
62 were collected using a 1 s exposure time. Scale bars are 1  $\mu$ m.

63

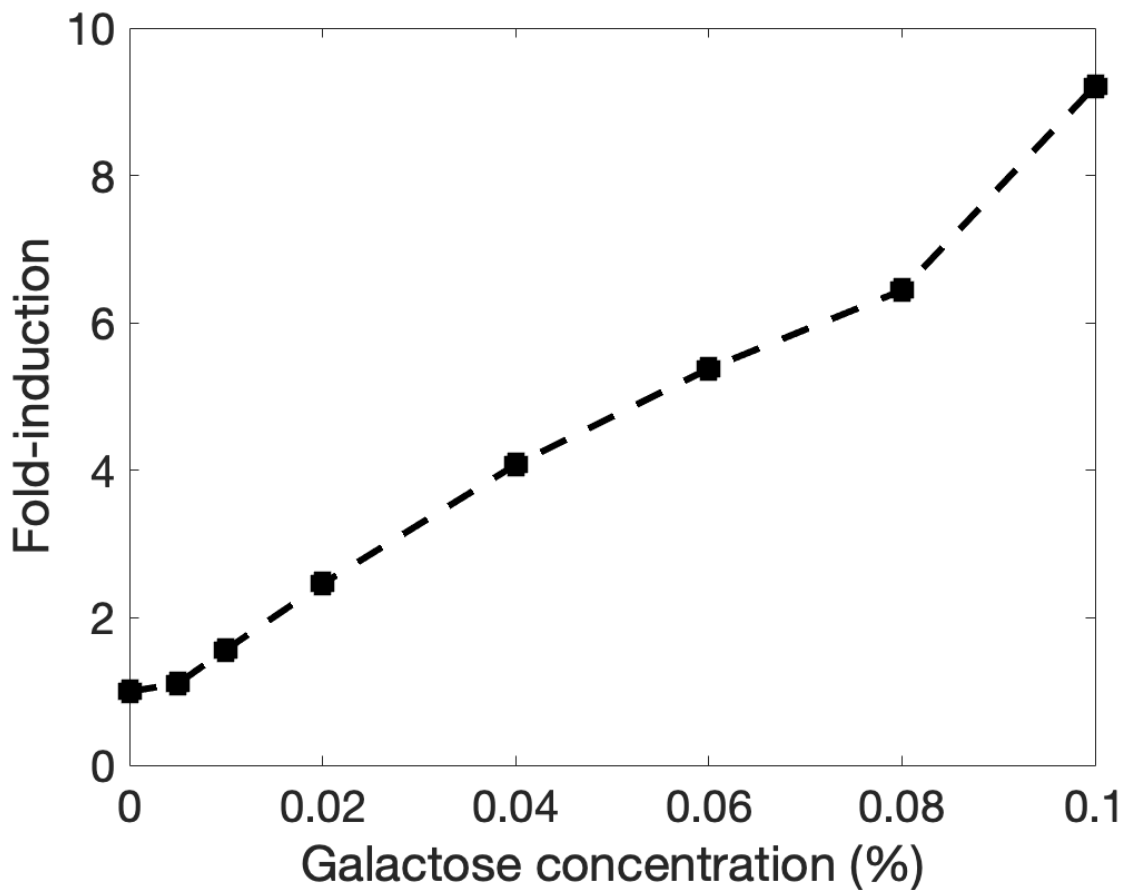

65

66 Supplementary Figure 6. Expression of mNG under the *GAL1* promoter is linear with  
67 galactose concentration in *gal2Δ* background. SYNZIP17-mNG was expressed under  
68 pGAL1 and grown overnight in synthetic complete media supplemented with 1%  
69 raffinose and a variable amount of galactose. No glucose was added to the media, as  
70 glucose represses the *GAL1* promoter. The expression of mNG was normalized first to  
71 the OD<sub>600</sub> of the culture, which was between 0.12 and 0.16. This fluorescence value  
72 was then normalized to the expression level at 0% galactose. At higher galactose  
73 concentrations (2%) we have seen fold-induction values of ~30.

74

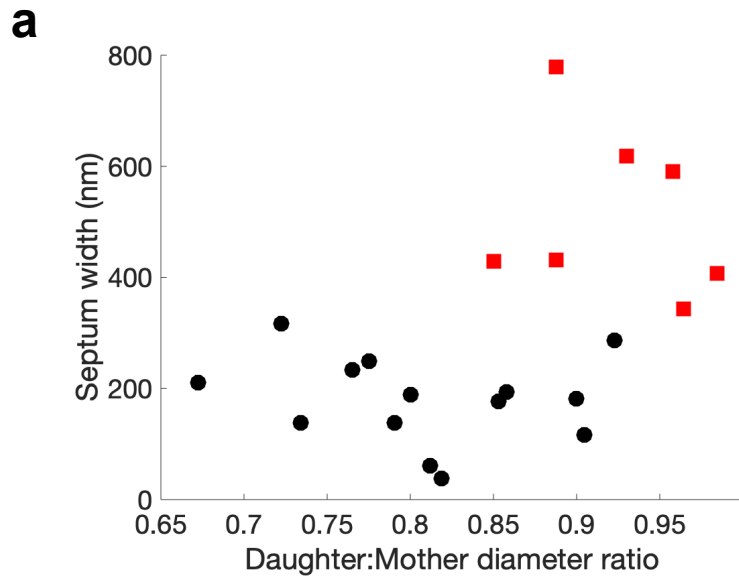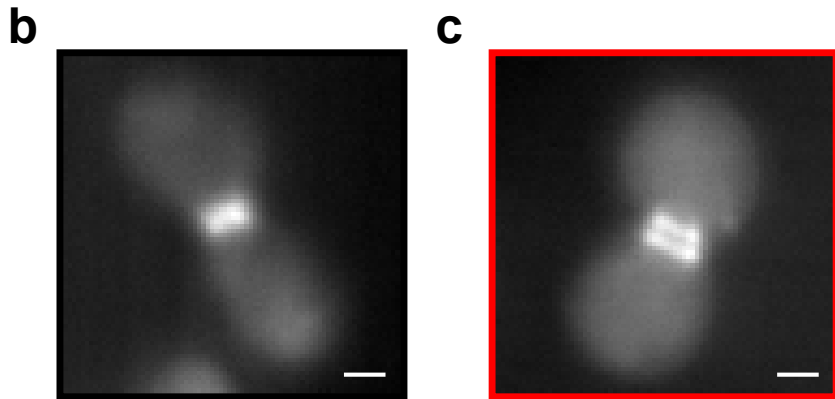

75

76 Supplementary Figure 7. Yeast septum width increases with daughter:mother diameter  
 77 ratio. (a) septum width plotted as a function of yeast daughter:mother diameter ratio,  
 78 with single-ring septa plotted with black dots and double-ring septa plotted with red  
 79 squares. See methods for how we determined septum width. Single-ring and double-  
 80 ring septa were readily identifiable from fluorescence images of single cells. (b) and (c)  
 81 show representative fluorescence images for single-ring and double-ring septa,  
 82 respectively. Both images were constructed from videos collected for 5,000 frames, with  
 83 a 50 ms exposure per frame and a laser power density of 3.1 W/cm<sup>2</sup>. Scale bars are 1  
 84 μm.



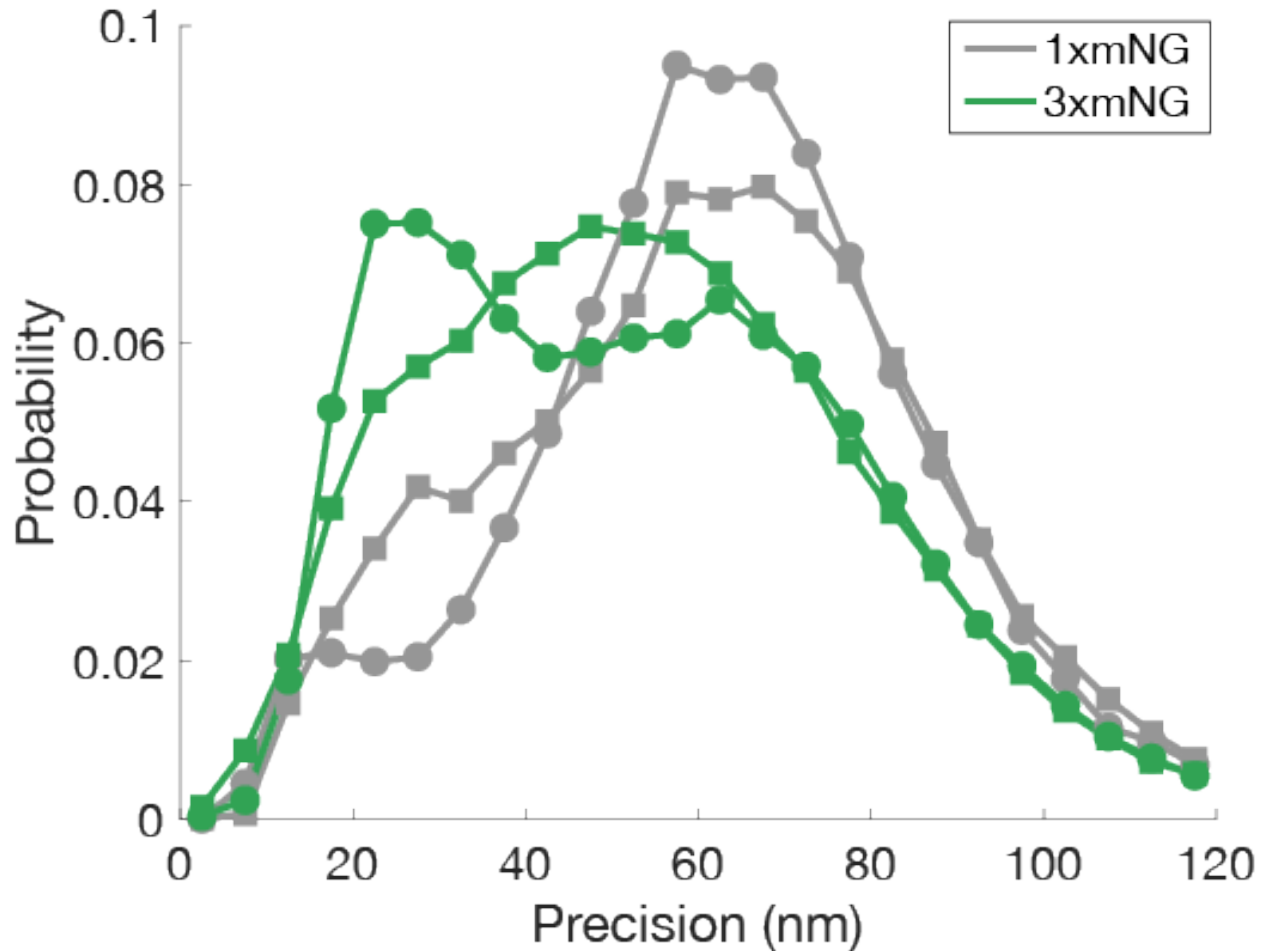

85

86 Supplementary Figure 8. SYNZIP17-3xmNG shows improved localization precision  
 87 compared with SYNZIP17-1xmNG. Full distribution of localization precision shown for  
 88 Cdc12p-SYNZIP18 + SYNZIP17-3xmNG (green line; circles and squares indicate two  
 89 replicates) and Cdc12-SYNZIP18 + SYNZIP17-1xmNG (gray line; circles and squares  
 90 indicate two replicates). Both experiments were performed by expressing the  
 91 fluorescent protein construct using 0.005% galactose in the yeast growth media. The  
 92 curves show the average of replicates for both the 3xmNG and 1xmNG constructs (n =  
 93 2 biological replicates), while the data points for both replicates are given as spots.  
 94 Microscopy videos used to generate this data was collected for 4,000 frames, with a 50

95 ms exposure per frame and a laser power density of  $3.1 \text{ W/cm}^2$ . The mean precision  
96 values of the 1xmNG replicates (63.4 nm and 63.9 nm) is significantly different from the  
97 mean precision of the 3xmNG replicates (52.2 nm and 53.1 nm), a with p-value of 0.05  
98 as determined by a one-tailed t-test (see methods). When comparing the medians  
99 between 1xmNG replicates (63.1 nm and 63.5 nm) and 3xmNG replicates (52.2 nm and  
100 53.1 nm), we obtained a similar result, with a p-value of 0.038. The number of  
101 localizations events for each curve is: 1xmNG: 31503 (gray circles) and 28053 (gray  
102 squares); 3xmNG: 56269 (green circles) and 69565 (green squares).

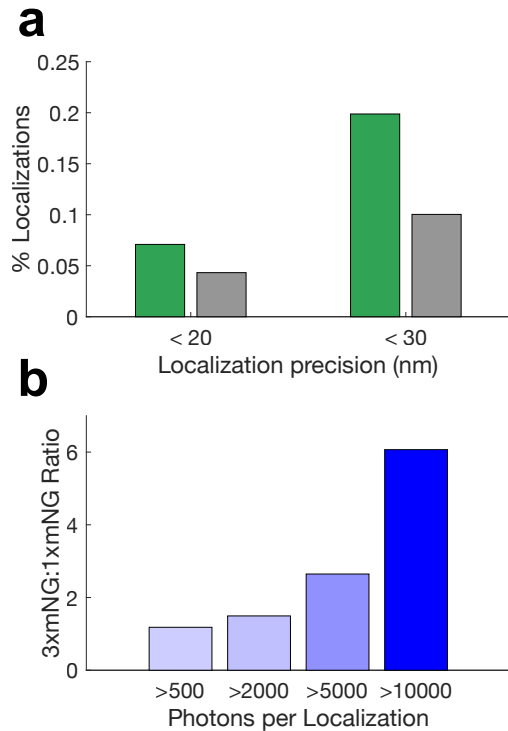

103

104 Supplementary Figure 9. Three tandem copies of mNG (3xmNG) shows improved  
 105 localization precision compared with a single copy of mNG fused to the cognate peptide  
 106 binding protein (a) Percentage of localizations with precision values < 20 nm or < 30  
 107 nm. Green bars represent data for 3xmNG, and the gray bars represents data for  
 108 1xmNG. (b) LIVE-PAINT with 3xmNG gives higher numbers of localizations with a large  
 109 number of photons than with mNG. The 3xmNG:mNG ratio of number of localizations is  
 110 plotted for each 'photons per localization' bin. The darker the blue bar, the greater the  
 111 enrichment in probability for 3xmNG compared with mNG in that bin. Data was collected  
 112 over a field of view including multiple cells for both the 1xmNG and 3xmNG data, and  
 113 two technical replicates were collected. Microscopy videos used to generate this data  
 114 was collected for 4,000 frames, with a 50 ms exposure per frame and a laser power  
 115 density of 3.1 W/cm<sup>2</sup>. This data was combined for this analysis. Number of localizations  
 116 events: 1xmNG: 59556; 3xmNG: 125834.

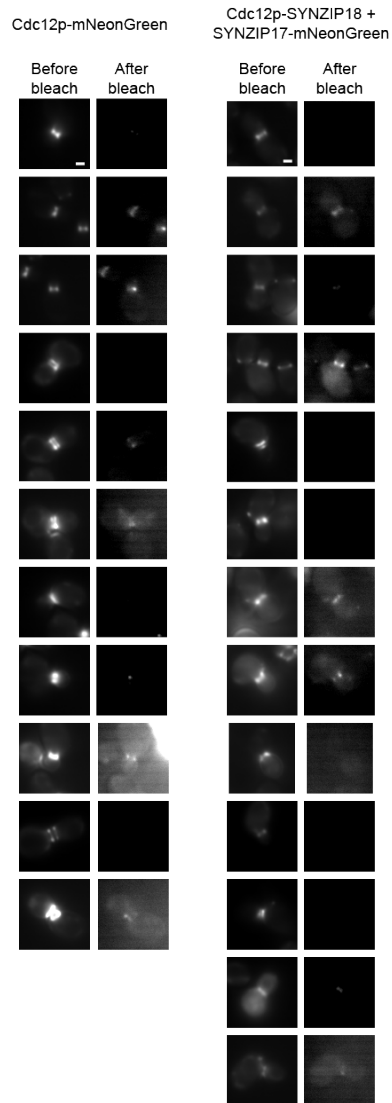

117

118 Supplementary Figure 10. Maximum projection images generated from videos collected

119 before and after bleaching, for all cells analyzed for the data shown in Figure 3. (Left)

120 Maximum projection images are shown for cells expressing Cdc12p-mNG. (Right)

121 Maximum projection images are shown for cells expressing Cdc12p-SYnZIP18 +

122 SYnZIP17-mNG. All images were constructed from videos collected for 1,000 frames,

123 with a 50 ms exposure per frame and a laser power density of 3.1 W/cm<sup>2</sup>. Scale bar is 1

124 μm.

**a**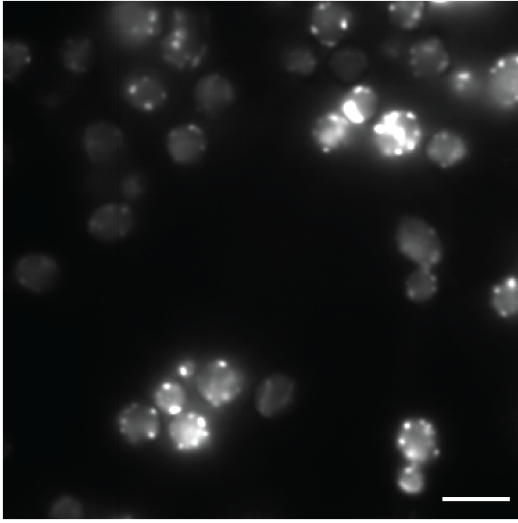**b**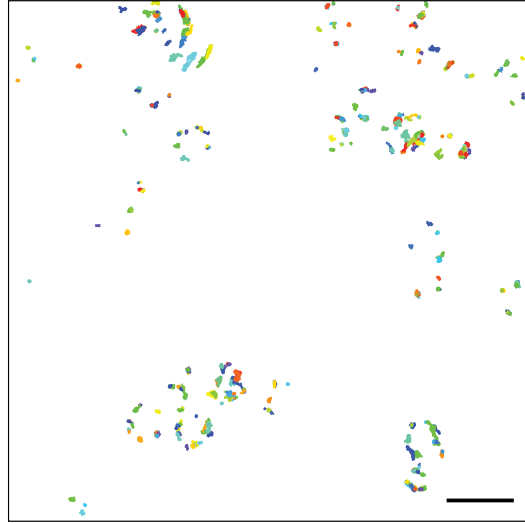

125

126 Supplementary Figure 11. Tracking of Cof1p in yeast cells. (a) Diffraction-limited image  
127 of the Cof1p in the yeast cells. (b) Tracks from individual Cof1p clusters. The image was  
128 constructed from a video collected for 4,000 frames, with a 50 ms exposure per frame  
129 and a laser power density of 3.1 W/cm<sup>2</sup>. Scale bar is 5 μm.

130

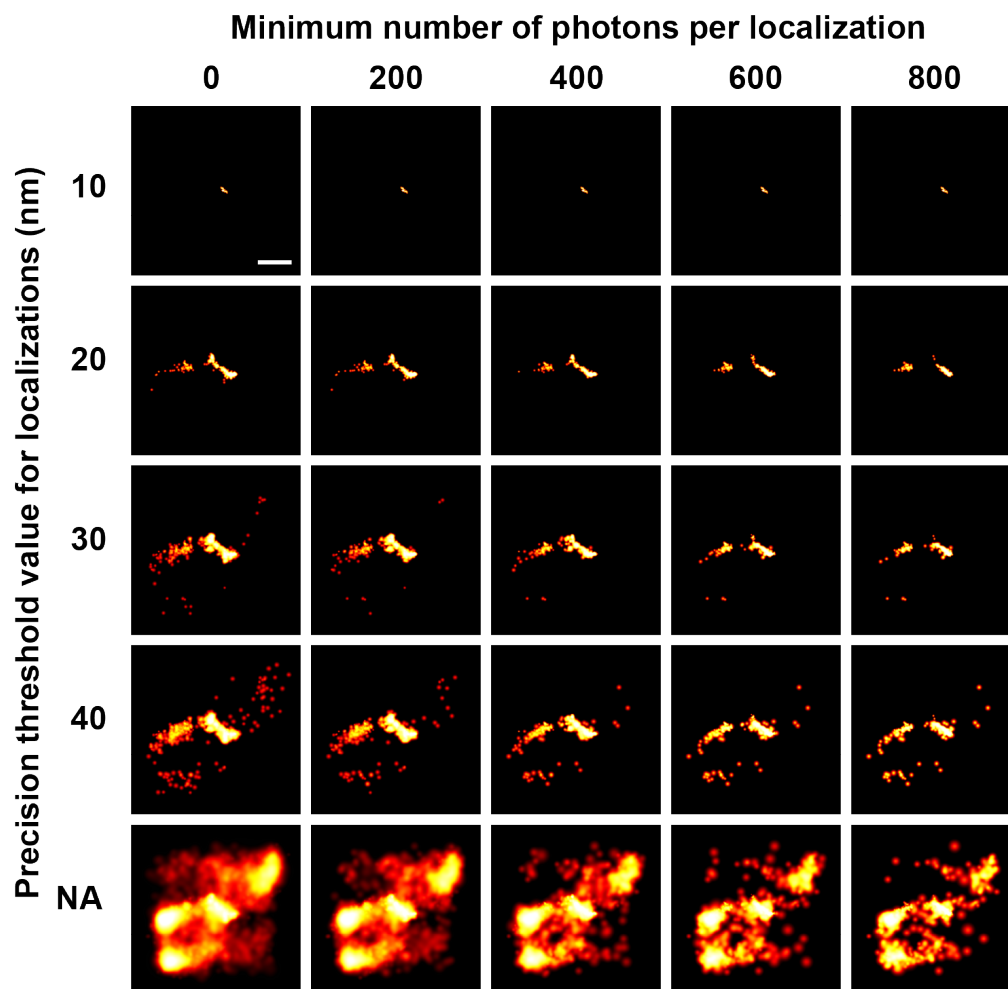

131  
 132 Supplementary Figure 12. One stack of images analyzed using different thresholds for  
 133 localization precision and minimum number of photons per localization. NA indicates no  
 134 precision value specified. The video used to construct the images collected for 6,000  
 135 frames, with a 50 ms exposure per frame and a laser power density of 3.1 W/cm<sup>2</sup>.  
 136 Number of localizations for each precision value, from left to right in the image: 10 nm:  
 137 46, 46, 46, 46, 46; 20 nm: 633, 617, 497, 328, 247; 30 nm: 1386, 1169, 746, 438, 330;  
 138 40 nm: 2013, 1547, 887, 526, 392; NA: 6248, 3764, 1855, 1089, 724. Scale bar is 1  $\mu$ m.

139 **Supplementary Tables**

140

141 Supplementary Table 1. Quantification of the total number of super-resolution

142 localisations and the percentage of these localisations in the septum for images shown

143 in Figure 2.

144

|                         | <b>TRAP</b>             |                  | <b>SYNZIP</b>           |                  |
|-------------------------|-------------------------|------------------|-------------------------|------------------|
|                         | %                       | Total number     | %                       | Total number     |
| Galactose concentration | localisations in septum | of localisations | localisations in septum | of localisations |
| 0 %                     | 14.71                   | 272              | 94.12                   | 153              |
| 0.005 %                 | 44.54                   | 348              | 97.99                   | 398              |
| 0.02%                   | 37.76                   | 429              | 42.69                   | 878              |
| 0.1%                    | 22.78                   | 1203             | 18.51                   | 1313             |

145

146

## 147 Supplementary Table 2. Sequencing Primers

| Label | Name            | Sequence                   | Purpose                                                |
|-------|-----------------|----------------------------|--------------------------------------------------------|
| S1    | CDC12_CT_F      | GAGGGTCACGAGAACACC         | Check C-terminus of <i>CDC12</i>                       |
| S2    | CDC12_CT_R      | CAGTTACTTCTGCTGGTTCC       | Check C-terminus of <i>CDC12</i>                       |
| S3    | GAL2_Seq_F      | CTAATCCAAGGAGGTTTAC        | Check <i>GAL2</i> locus                                |
| S4    | GAL2_Seq_R      | TAAGAGAGATGATGGAGC         | Check <i>GAL2</i> locus                                |
| S5    | SP6_Seq_F       | ATTTAGGTGACACTATAG         | Sequence pFA6a-HIS3MX6<br>and pFA6a-KANMX6<br>plasmids |
| S6    | T7_Seq_F        | TAATACGACTCACTATAGGG       | Sequence pFA6a-HIS3MX6<br>and pFA6a-KANMX6<br>plasmids |
| S7    | HIS_SEQ_F       | CGTTAGAACGCGGCTAC          | Sequence pFA6a-HIS3MX6<br>plasmids                     |
| S8    | GAL2_SEQ_F2     | GCTGCAGAAGGCACATCTA        | Check <i>GAL2</i> locus                                |
| S9    | GAL2_SEQ_R<br>2 | CCCAGAGATAAGTCTGGTGAT<br>G | Check <i>GAL2</i> locus                                |
| S10   | pCUP1_seq_F     | CATATAGAAGTCATCGACTAG<br>T | Check pCu415CUP1<br>plasmid                            |
| S11   | pCUP1_seq_R     | GACGGTATCGATAAGCTT         | Check pCu415CUP1<br>plasmid                            |
| S12   | COF1_seq_F      | CCTTAAACGGTGTCTCTACC       | Check C-terminus of <i>COF1</i>                        |



|     |            |                      |                                 |
|-----|------------|----------------------|---------------------------------|
| S13 | COF1_seq_R | GGTGTACGGGACCTTAAATC | Check C-terminus of <i>COF1</i> |
|-----|------------|----------------------|---------------------------------|

148

149

150 Supplementary Table 3. Primers for amplifying plasmid backbone

| Label | Name          | Sequence                         | Purpose                                                                                                                                                     |
|-------|---------------|----------------------------------|-------------------------------------------------------------------------------------------------------------------------------------------------------------|
| C1    | p6k_ath1_F    | TTGCAAACCCAGAGCCTG               | Amplify pFA6a-KANMX6 backbone to replace MEEVF with another peptide                                                                                         |
| C2    | p6k_ath1_R    | TGATGAGTCATGTAATTAGTTA<br>TGT    | Amplify pFA6a-KANMX6 backbone to replace MEEVF with another peptide                                                                                         |
| C3    | p6h_ath2_F    | GAATCCGGGGTTTTTCT                | Amplify pFA6a-HIS3MX6 backbone to replace TRAP4 with another protein                                                                                        |
| C4    | p6h_ath2_R    | CTGCAGATGAGTGCGATTA              | Amplify pFA6a-HIS3MX6 backbone to replace TRAP4 with another protein                                                                                        |
| C5    | p6h_ath3_t4_F | TTGCTCCTTCAGATTTTCT              | Amplify pFA6a-HIS3MX6 backbone to replace TRAP4 mEOS with another fluorescent protein (e.g. mNG). TRAP4 is left to make a TRAP4-fluorescent protein fusion. |
| C6    | p6h_ath3_sz_F | CTTGTAAGCTTCAATTCCTTT<br>CTCAAGT | Amplify pFA6a-HIS3MX6 backbone to replace                                                                                                                   |

|    |             |                                |                                                                                                                                                                                            |
|----|-------------|--------------------------------|--------------------------------------------------------------------------------------------------------------------------------------------------------------------------------------------|
|    |             |                                | SYNZIP17 mEOS with another fluorescent protein (e.g. mNG). SYNZIP17 is left to make a SYNZIP17-fluorescent protein fusion.                                                                 |
| C7 | p6h_ath3_R  | TGATAAGTCATGTAATTAGTTA<br>TGTC | Amplify pFA6a-HIS3MX6 backbone to replace TRAP4 or SYNZIP mEOS with another fluorescent protein (e.g. mNG). TRAP4 or SYNZIP17 is left to make a TRAP4/SYNZIP17-fluorescent protein fusion. |
| C8 | pCUP1_ATH_F | AAGCTTATCGATACCGTC             | Amplify pCu415CUP1 backbone to replace product under expression of <i>CUP1</i> promoter                                                                                                    |
| C9 | pCUP1_ATH_R | ACTAGTCGATGACTTCTATATG         | Amplify pCu415CUP1 backbone to replace product under expression of <i>CUP1</i> promoter                                                                                                    |

151

152

153 Supplementary Table 4. Integration primers

| Label | Name      | Sequence                                                                            | Purpose                                                                                                                                            |
|-------|-----------|-------------------------------------------------------------------------------------|----------------------------------------------------------------------------------------------------------------------------------------------------|
| I1    | p6h_int_F | CTAATCCAAGG<br>AGGTTTACGGA<br>CCAGGGGAAC<br>TTTCCAGATTC<br>AGAAGCTTCGT<br>ACGCTGCA  | Amplify the entire cassette from pFA6a-HIS3MX6 (e.g. TRAP4-mEOS under <i>GAL1</i> promoter, plus <i>HIS3</i> marker) for transformation into yeast |
| I2    | p6h_int_R | CATGAAAAATT<br>AAGAGAGATGA<br>TGGAGCGTCTC<br>ACTTCAAACGC<br>AGGCGTTAGTA<br>TCGAATCG | Amplify the entire cassette from pFA6a-HIS3MX6 (e.g. TRAP4-mEOS under <i>GAL1</i> promoter, plus <i>HIS3</i> marker) for transformation into yeast |
| I3    | p6k_int_F | GAAGAGCAGG<br>TCAAAGCTTG<br>CAAGTAAAAAA<br>ATCCCATTAA<br>AAGGTGGATCA<br>GGCTCTGG    | Amplify the entire cassette from pFA6a-KANMX6 (e.g. GS-MEEVF, plus KANMX6 marker) for transformation into yeast                                    |
| I4    | p6k_int_R | AGGCGTTGAAA<br>TTGACGAGACA<br>AAGAGGAAGA                                            | Amplify the entire cassette from pFA6a-KANMX6 (e.g. GS-MEEVF, plus KANMX6 marker) for transformation into yeast                                    |

|    |             |                                                                                              |                                                                                                                                      |
|----|-------------|----------------------------------------------------------------------------------------------|--------------------------------------------------------------------------------------------------------------------------------------|
|    |             | CATTAATTAAT<br>CATTAGAAAAA<br>CTCATCGAGCA<br>TC                                              |                                                                                                                                      |
| I5 | p6kcof1intF | TACGATTCTGT<br>TTTGGAAAGAG<br>TCAGCAGAGG<br>CGCTGGTTCTC<br>ATGGTGGATCA<br>GGCTCTGG           | Amplify the entire cassette from pFA6a-KANMX6 (e.g. GS-MEEVF, plus KANMX6 marker) for transformation into yeast at <i>COF1</i> locus |
| I6 | p6kcof1intR | TTTCATTTTTCT<br>TGAAGATTGTT<br>GTCATTTGTGA<br>AATCATTTACC<br>ATTAGAAAAAC<br>TCATCGAGCAT<br>C | Amplify the entire cassette from pFA6a-KANMX6 (e.g. GS-MEEVF, plus KANMX6 marker) for transformation into yeast at <i>COF1</i> locus |

154

155

156 Supplementary Table 5. Yeast strains used in this study

| Strain                                           | Parent | Genotype                                                                                                    | Reference      |
|--------------------------------------------------|--------|-------------------------------------------------------------------------------------------------------------|----------------|
| BY4741                                           | -      | MATa his3Δ1 leu2Δ0 met15Δ0 ura3Δ0                                                                           | Marsden<br>Lab |
| TRAP4-mNG                                        | BY4741 | MATa his3Δ1 leu2Δ0 met15Δ0 ura3Δ0<br>gal2Δ::His3MX6 TRAP4-mNG                                               | This study     |
| SYNZIP17-mNG                                     | BY4741 | MATa his3Δ1 leu2Δ0 met15Δ0 ura3Δ0<br>gal2Δ::His3MX6 SYNZIP17-mNG                                            | This study     |
| CDC12-MEEVF +<br>TRAP4-mNG                       | BY4741 | MATa his3Δ1 leu2Δ0 met15Δ0 ura3Δ0<br>gal2Δ::His3MX6 TRAP4-mNG CDC12-<br>MEEVF::KanMX6                       | This study     |
| CDC12-MEEVF +<br>TRAP4-mNG +<br>SYNZIP17-mCherry | BY4741 | MATa his3Δ1 leu2Δ0 met15Δ0 ura3Δ0:<br>Ura3 SYNZIP17-mCherry gal2Δ::His3MX6<br>TRAP4-mNG CDC12-MEEVF::KanMX6 | This study     |
| CDC12-SYNZIP18 +<br>SYNZIP17-mNG                 | BY4741 | MATa his3Δ1 leu2Δ0 met15Δ0 ura3Δ0<br>gal2Δ::His3MX6 SYNZIP17-mNG CDC12-<br>SYNZIP18::KanMX6                 | This study     |
| CDC12-SYNZIP18 +<br>SYNZIP17-mKO                 | BY4741 | MATa his3Δ1 leu2Δ0 met15Δ0 ura3Δ0<br>gal2Δ::His3MX6 SYNZIP17-mKO CDC12-<br>SYNZIP18::KanMX6                 | This study     |

|                                      |        |                                                                                                |            |
|--------------------------------------|--------|------------------------------------------------------------------------------------------------|------------|
| CDC12-SYNZIP18 +<br>SYNZIP17-mOrange | BY4741 | MATa his3Δ1 leu2Δ0 met15Δ0 ura3Δ0<br>gal2Δ::His3MX6 SYNZIP17-mOrange<br>CDC12-SYNZIP18::KanMX6 | This study |
| CDC12-SYNZIP18 +<br>SYNZIP17-mCherry | BY4741 | MATa his3Δ1 leu2Δ0 met15Δ0 ura3Δ0<br>gal2Δ::His3MX6 SYNZIP17-mCherry<br>CDC12-SYNZIP18::KanMX6 | This study |
| CDC12-SYNZIP18 +<br>SYNZIP17-3xmNG   | BY4741 | MATa his3Δ1 leu2Δ0 met15Δ0 ura3Δ0<br>gal2Δ::His3MX6 SYNZIP17-3xmNG CDC12-<br>SYNZIP18::KanMX6  | This study |
| CDC12-101B +<br>101A-mNG             | BY4741 | MATa his3Δ1 leu2Δ0 met15Δ0 ura3Δ0<br>gal2Δ::His3MX6 101A-mNG CDC12-<br>101B::KanMX6            | This study |
| CDC12-108B +<br>108A-mNG             | BY4741 | MATa his3Δ1 leu2Δ0 met15Δ0 ura3Δ0<br>gal2Δ::His3MX6 108A-mNG CDC12-<br>108B::KanMX6            | This study |
| CDC12-CCBN3,5 +<br>CCAN3,5-mEOS      | BY4741 | MATa his3Δ1 leu2Δ0 met15Δ0 ura3Δ0<br>gal2Δ::His3MX6 CCAN3,5-mEOS CDC12-<br>CCBN3,5::KanMX6     | This study |
| COF1-MEEVF +<br>TRAP4-mNG            | BY4741 | MATa his3Δ1 leu2Δ0 met15Δ0 ura3Δ0<br>gal2Δ::His3MX6 TRAP4-mNG COF1-<br>MEEVF::KanMX6           | This study |

|                                 |        |                                                                                            |            |
|---------------------------------|--------|--------------------------------------------------------------------------------------------|------------|
| COF1-SYNZIP18 +<br>SYNZIP17-mNG | BY4741 | MATa his3Δ1 leu2Δ0 met15Δ0 ura3Δ0<br>gal2Δ::His3MX6 SYNZIP17-mNG COF1-<br>SYNZIP18::KanMX6 | This study |
|---------------------------------|--------|--------------------------------------------------------------------------------------------|------------|

157
