# Supplementary material for: LIVE-PAINT allows super-resolution microscopy inside living cells using reversible peptide-protein interactions
Source: PubMed Central journal article supplement (PMC7441314; doi:10.1038/s42003-020-01188-6), 2020-08-20
Supplement: 42003_2020_1188_MOESM8_ESM.pdf [file 42003_2020_1188_MOESM8_ESM.pdf]

## **Description of Additional Supplementary Files**

**File Name: Supplementary Movie 1**

**Description:** Video showing blinking of mKO during LIVE-PAINT data acquisition.

**File Name: Supplementary Movie 2**

**Description:** Video showing blinking of mOrange during LIVE-PAINT data acquisition.

**File Name: Supplementary Movie 3**

**Description:** Video showing moving cofilin clusters.

**File Name: Supplementary Movie 4**

**Description:** Video showing tracks for moving cofilin clusters.
